# Supplementary material for: Neutral noble-metal-free VCoO2 and CrCoO2 cluster catalysts for CO oxidation by O2
Source: Royal Society of Chemistry journal article supplement (doi:10.1039/d0nj05199c), 2021-01-01
Supplement: d0nj05199c1.pdf [file d0nj05199c1.pdf]

**Neutral Noble-Metal-Free VCoO<sub>2</sub> and CrCoO<sub>2</sub> Cluster Catalysts for  
CO Oxidation by O<sub>2</sub>**

Suresh Sampathkumar, Selvarengan Paranthaman\*

*Department of Physics and International Research Centre, Kalasalingam Academy of  
Research and Education (Deemed to be University), Krishnankoil 626 126, India.*

Corresponding Author E-mail: [psrengan@hotmail.com](mailto:psrengan@hotmail.com)

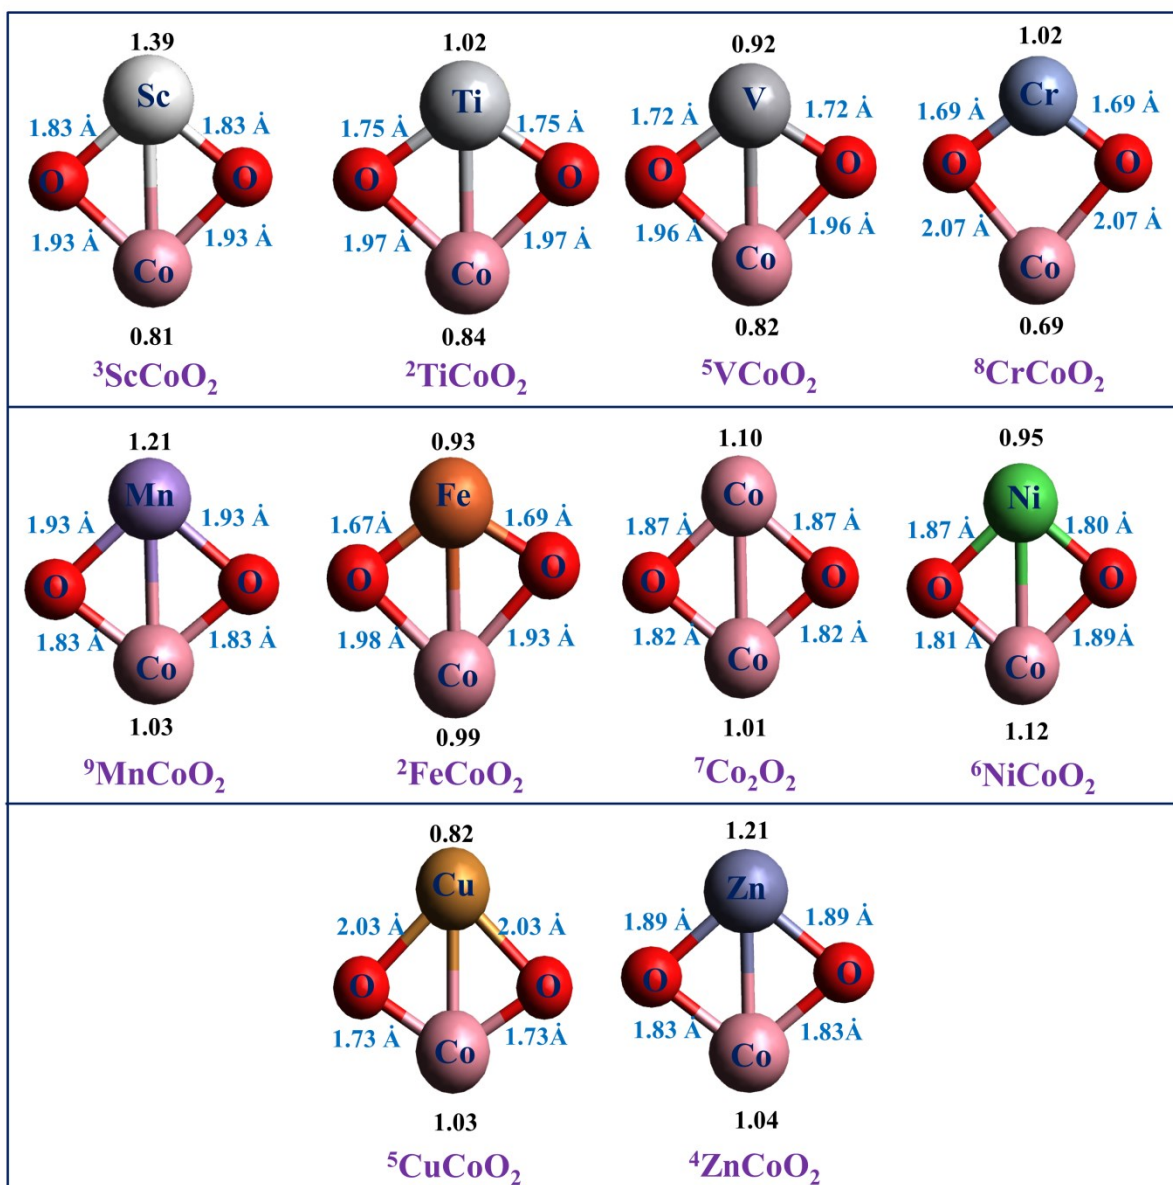

**Figure S1.** Optimized  $\text{TMCuO}_2$  (TM=Sc–Zn) clusters at B3LYP/TZVP method. (Superscript value corresponds to ground electronic state of the cluster, blue colour values represent bond distance values (in Å) and black colour values represent natural charge values respectively)

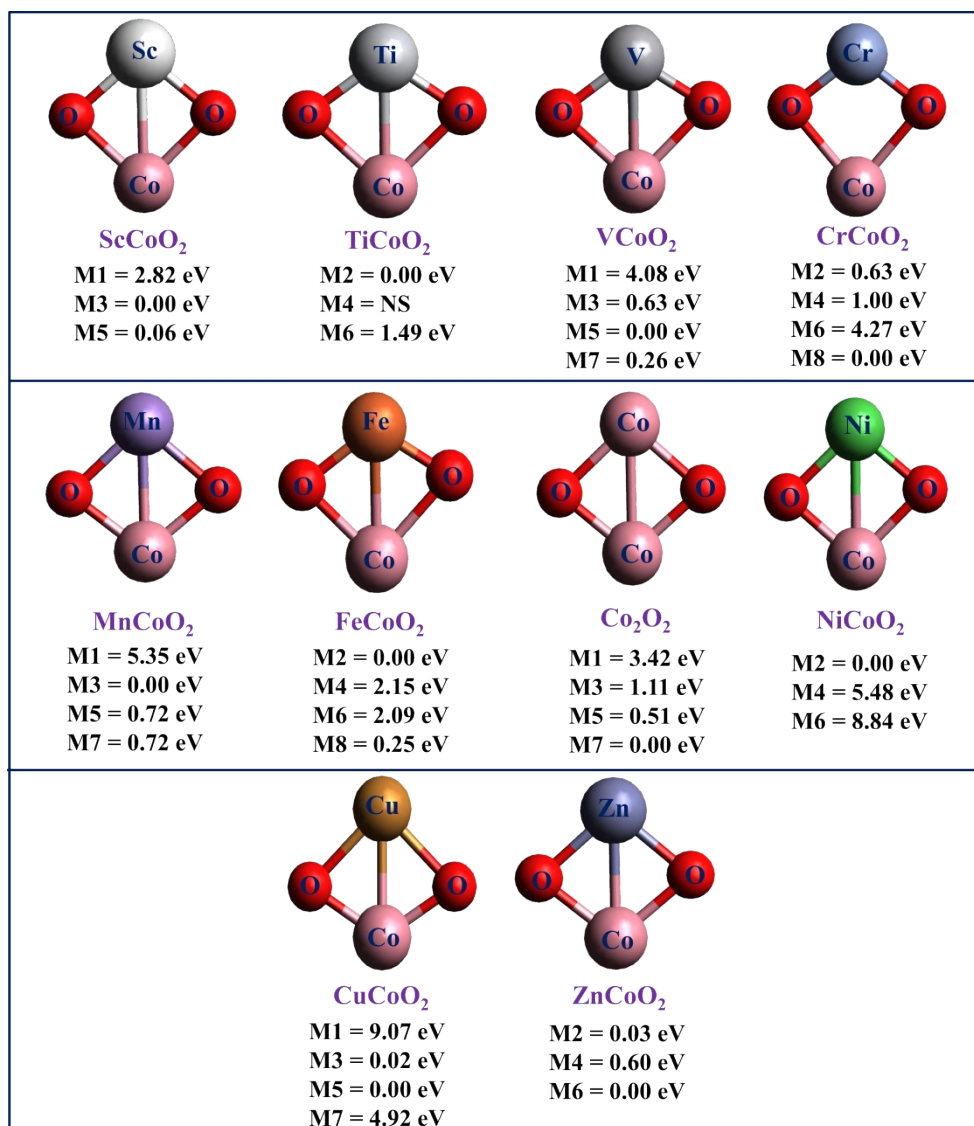

**Figure S2.** Optimized TMCoO<sub>2</sub> (TM=Sc–Zn) clusters with various spin multiplicities at PBE0/def2-TZVPP method in NWChem 6.0 program. (M denotes the spin multiplicity (2S+1), NS=Not Stable)

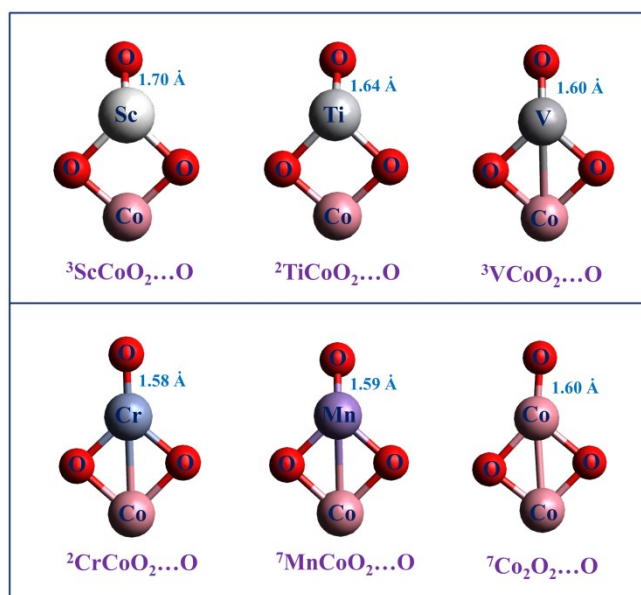

**Figure S3.** The optimized structures of interaction between  $\text{TMCoO}_2$  (TM= Sc–Mn, Co) clusters with O atom at B3LYP/TZVP method. (Superscript value corresponds to ground electronic state of the clusters and blue colour values represent bond distance values (in Å))

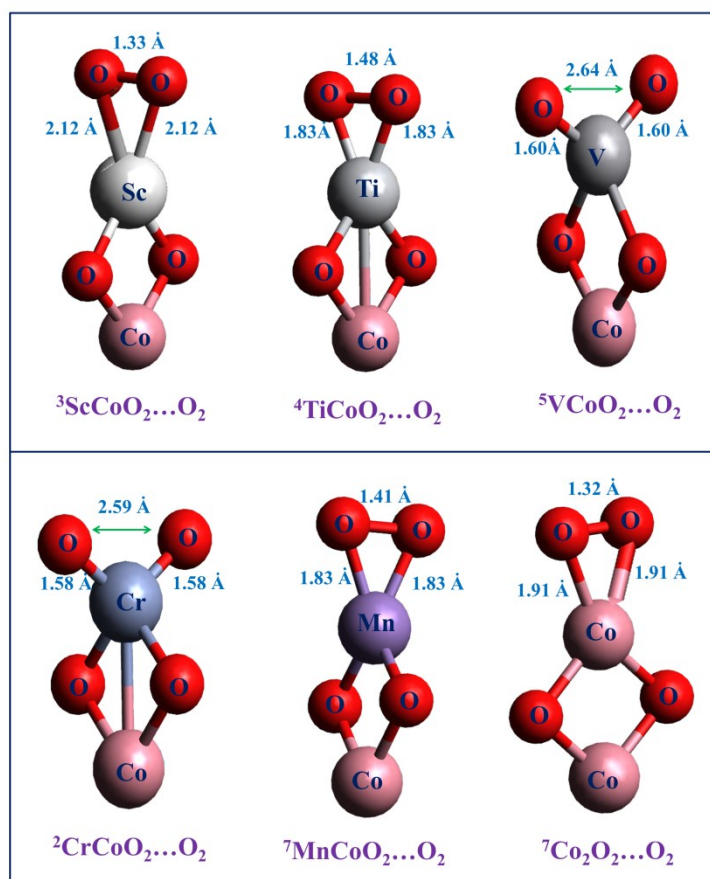

**Figure S4.** The optimized structures of interaction between TMCoO<sub>2</sub> (TM=Sc–Mn, Co) clusters with O<sub>2</sub> molecule at B3LYP/TZVP method. (Superscript value corresponds to ground electronic state of the clusters and blue colour values represent bond distance values (in Å))

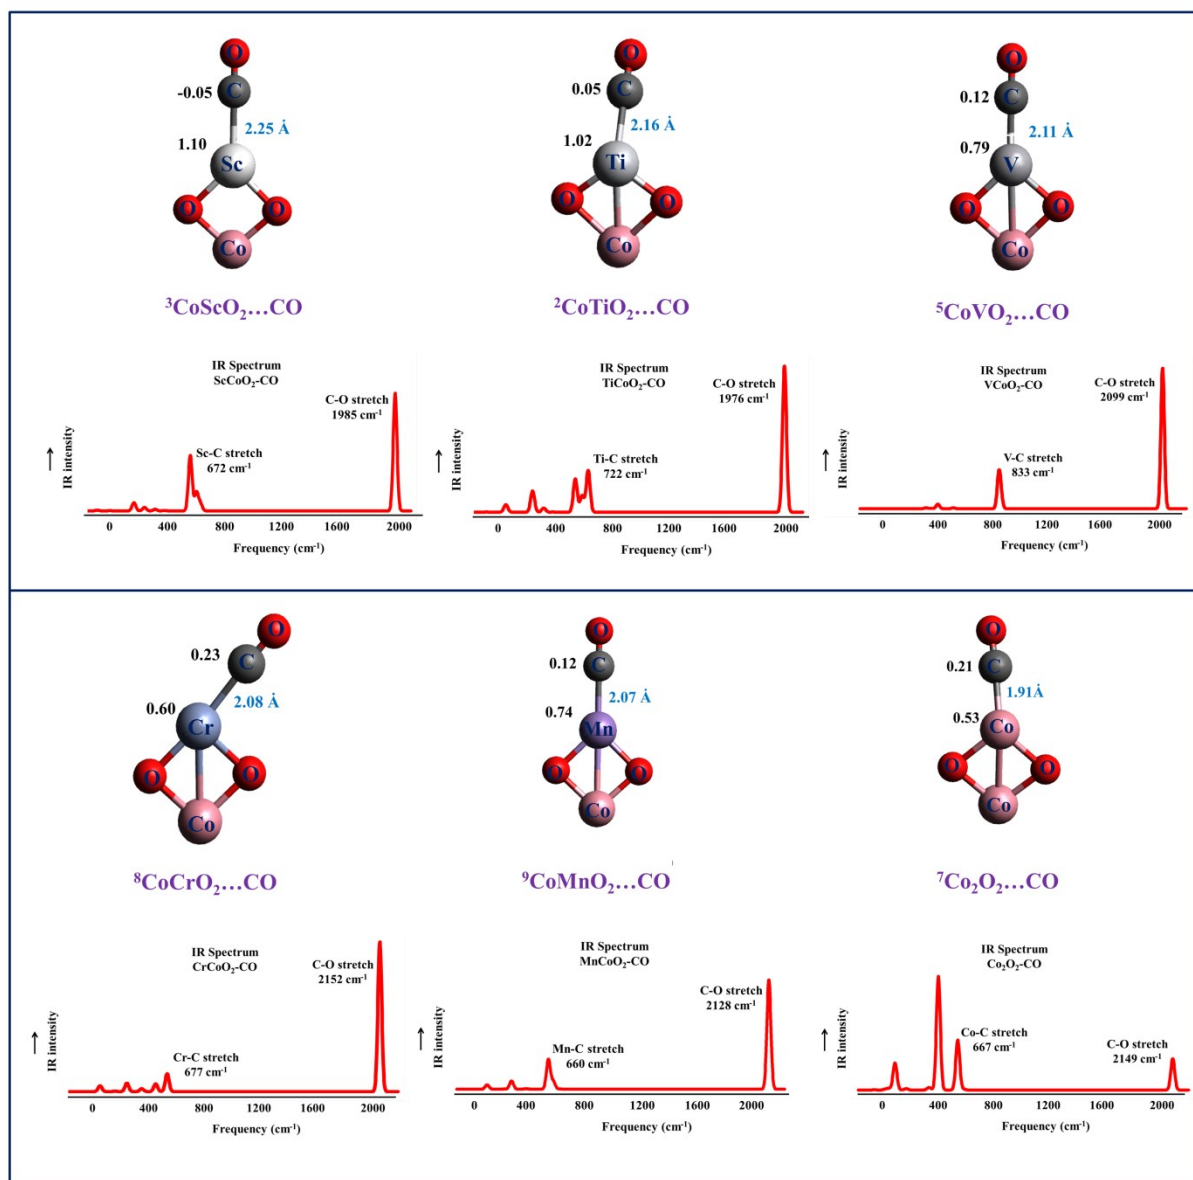

**Figure S5.** The optimized structures of interaction between TMCoO<sub>2</sub> (TM=Sc–Mn, Co) clusters with CO molecule along with its IR spectrum at B3LYP/TZVP method. (Superscript value corresponds to ground electronic state of the clusters and blue colour values represent bond distance values (in Å))

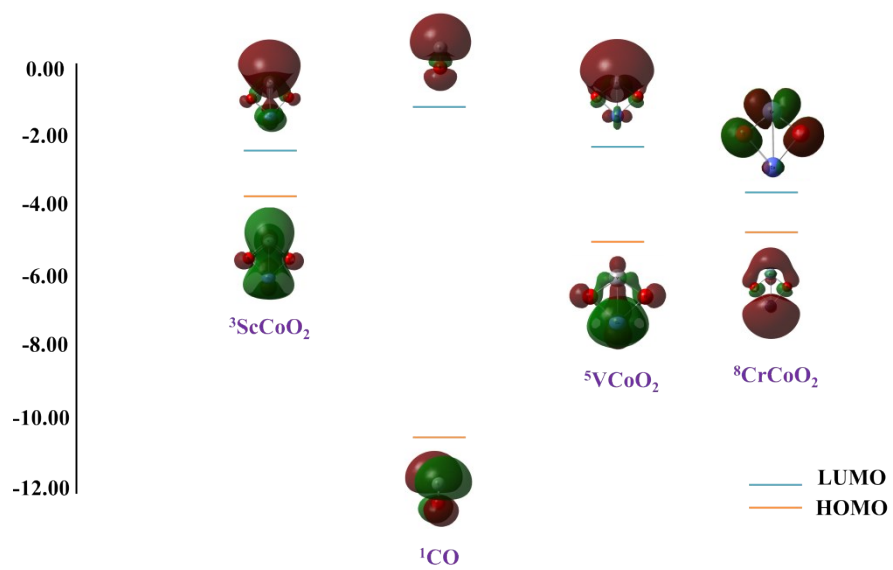

**Figure S6.** The HOMO and LUMO diagrams of  $\text{ScCoO}_2$ ,  $\text{VCoO}_2$ ,  $\text{CrCoO}_2$  clusters and  $\text{CO}$  molecule.

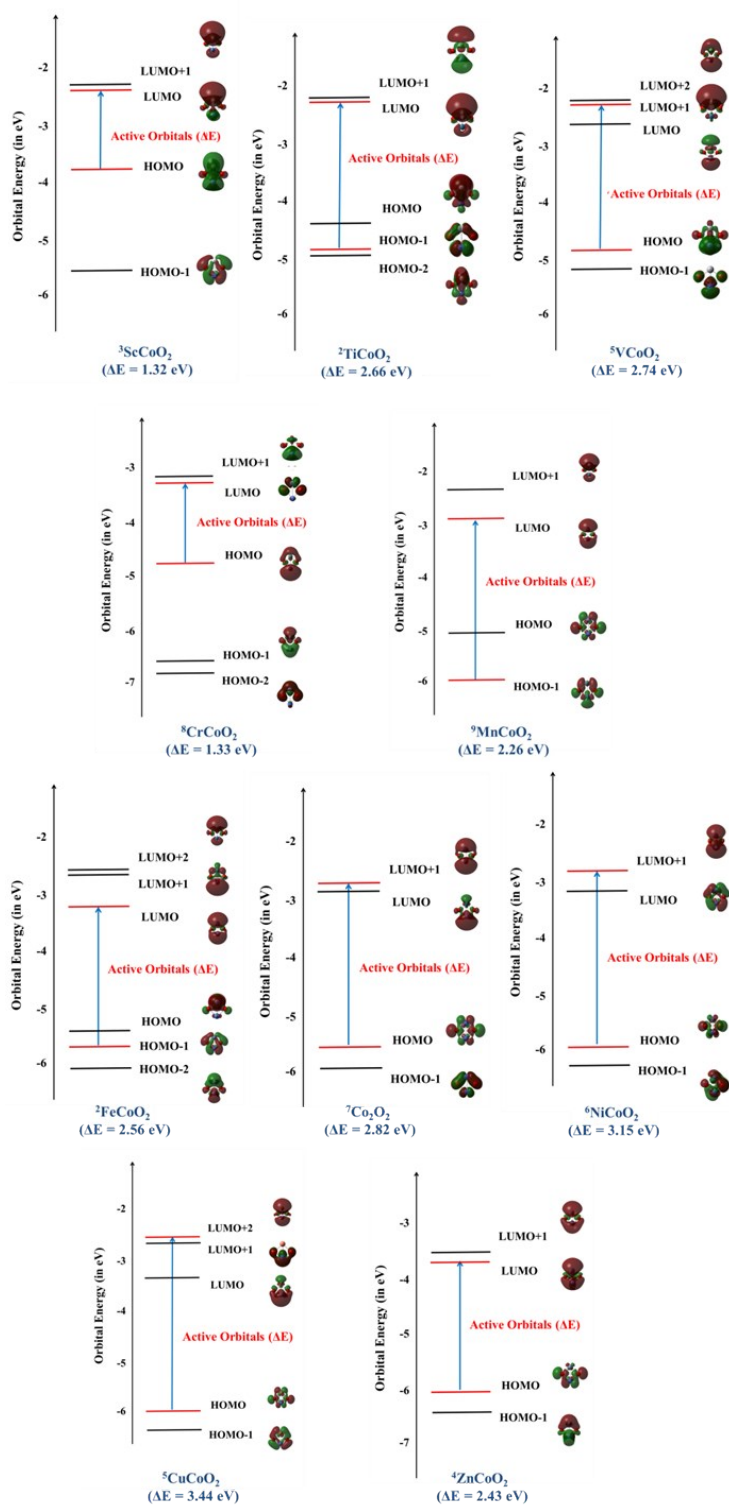

**Figure S7.** The frontier molecular orbital diagram of  $\text{TMCuO}_2$  (TM=Sc–Zn) clusters (Pair of active orbitals for HOMO-LUMO calculation).



**Table S1.** Calculated dissociation energies to remove an oxygen atom DE(O), molecular oxygen DE(O<sub>2</sub>), doped TM atom (TM=Sc–Zn) and Co atom (energies in eV) in TMCoO<sub>2</sub> (TM=Sc–Zn) clusters.

| <b>TMCoO<sub>2</sub></b>                    | <b>DE(O)</b> | <b>DE(O<sub>2</sub>)</b> | <b>DE(TM)</b> | <b>DE(Co)</b> |
|---------------------------------------------|--------------|--------------------------|---------------|---------------|
| <sup>3</sup> ScCoO <sub>2</sub>             | 5.08         | 7.12                     | 6.89          | 2.55          |
| <sup>2</sup> TiCoO <sub>2</sub>             | 6.32         | 8.11                     | 7.95          | 2.11          |
| <sup>5</sup> VCoO <sub>2</sub>              | 6.12         | 7.13                     | 7.93          | 2.31          |
| <sup>8</sup> CrCoO <sub>2</sub>             | 4.97         | 4.91                     | 6.17          | 2.35          |
| <sup>9</sup> MnCoO <sub>2</sub>             | 5.11         | 5.33                     | 4.62          | 5.01          |
| <sup>2</sup> FeCoO <sub>2</sub>             | 3.79         | 3.74                     | 3.47          | 1.99          |
| <sup>7</sup> Co <sub>2</sub> O <sub>2</sub> | 4.68         | 5.25                     | -             | 4.41          |
| <sup>6</sup> NiCoO <sub>2</sub>             | 5.07         | 4.15                     | 4.56          | 4.91          |
| <sup>5</sup> CuCoO <sub>2</sub>             | 4.23         | 3.32                     | 3.58          | 6.35          |
| <sup>4</sup> ZnCoO <sub>2</sub>             | 4.20         | 3.38                     | 2.37          | 5.37          |

**Table S2.** The HOMO-LUMO gap (pair of active orbitals) values (in eV) of TMCoO<sub>2</sub> (TM=Sc–Zn) clusters.

| <b>TMCoO<sub>2</sub></b>                    | <b>H-L Gap</b> |
|---------------------------------------------|----------------|
| <sup>3</sup> ScCoO <sub>2</sub>             | 1.32           |
| <sup>2</sup> TiCoO <sub>2</sub>             | 2.66           |
| <sup>5</sup> VCoO <sub>2</sub>              | 2.74           |
| <sup>8</sup> CrCoO <sub>2</sub>             | 1.33           |
| <sup>9</sup> MnCoO <sub>2</sub>             | 2.26           |
| <sup>2</sup> FeCoO <sub>2</sub>             | 2.56           |
| <sup>7</sup> Co <sub>2</sub> O <sub>2</sub> | 2.82           |
| <sup>6</sup> NiCoO <sub>2</sub>             | 3.15           |
| <sup>5</sup> CuCoO <sub>2</sub>             | 3.44           |
| <sup>4</sup> ZnCoO <sub>2</sub>             | 2.43           |

**Table S3.** Calculated dissociation energies to remove an oxygen atom DE(O), molecular oxygen DE(O<sub>2</sub>), doped TM atom (TM=Sc–Zn) and Co atom (energies in eV) and vertical ionization energy (VIE) of TMCoO<sub>3-4</sub> (TM=V, Cr) clusters.

| <b>TMCoO<sub>3-4</sub></b>      | <b>DE(O)</b> | <b>DE(O<sub>2</sub>)</b> | <b>DE(TM)</b> | <b>DE(Co)</b> | <b>VIE</b> |
|---------------------------------|--------------|--------------------------|---------------|---------------|------------|
| <sup>3</sup> VCoO <sub>3</sub>  | 5.89         | 6.90                     | 10.59         | 4.90          | 9.06       |
| <sup>5</sup> VCoO <sub>4</sub>  | 3.70         | 4.48                     | 10.56         | 6.16          | 9.72       |
| <sup>2</sup> CrCoO <sub>3</sub> | 5.90         | 5.76                     | 7.96          | 5.22          | 11.12      |
| <sup>2</sup> CrCoO <sub>4</sub> | 3.26         | 4.04                     | 7.49          | 4.91          | 10.40      |

**Table S4.** Relative Energy ( $\Delta E$ ), Enthalpy of Reaction ( $\Delta H$ ) and Gibbs Free Energy ( $\Delta G$ ) changes during the CO oxidation reaction process with VCoO<sub>2</sub> and CrCoO<sub>2</sub> cluster (energies in eV).

| species                                                               | B3LYP/TZVP |            |            | M06/TZVP   | species                                                                 | B3LYP/TZVP |            |            | M06/TZVP   |
|-----------------------------------------------------------------------|------------|------------|------------|------------|-------------------------------------------------------------------------|------------|------------|------------|------------|
|                                                                       | $\Delta E$ | $\Delta H$ | $\Delta G$ | $\Delta E$ |                                                                         | $\Delta E$ | $\Delta H$ | $\Delta G$ | $\Delta E$ |
| <b>VCoO<sub>4</sub> + CO → VCoO<sub>3</sub> + CO<sub>2</sub></b>      |            |            |            |            | <b>CrCoO<sub>4</sub> + CO → CrCoO<sub>3</sub> + CO<sub>2</sub></b>      |            |            |            |            |
| RC1                                                                   | 0.00       | 0.00       | 0.00       | 0.00       | RC4                                                                     | 0.00       | 0.00       | 0.00       | 0.00       |
| IM1                                                                   | -2.12      | -2.18      | -1.67      | -2.32      | IM9                                                                     | -2.35      | -2.39      | -1.92      | -2.70      |
| TS1                                                                   | -1.11      | -1.03      | -0.51      | -1.05      | TS5                                                                     | -0.73      | -0.75      | 0.03       | -1.53      |
| IM2                                                                   | -2.22      | -2.33      | -1.93      | -2.23      | IM10                                                                    | -1.89      | -1.92      | -1.18      | -2.28      |
| PC1                                                                   | -1.74      | -1.76      | -1.73      | -1.80      | PC4                                                                     | -2.18      | -2.19      | -2.21      | -2.31      |
| <b>VCoO<sub>3</sub> + 2CO → VCoO<sub>2</sub>(CO) + CO<sub>2</sub></b> |            |            |            |            | <b>CrCoO<sub>3</sub> + 2CO → CrCoO<sub>2</sub>(CO) + CO<sub>2</sub></b> |            |            |            |            |
| RC2                                                                   | 0.00       | 0.00       | 0.00       | 0.00       | RC5                                                                     | 0.00       | 0.00       | 0.00       | 0.00       |
| IM3                                                                   | -0.82      | -0.83      | -0.41      | -0.53      | IM11                                                                    | -0.38      | -0.40      | -0.01      | -0.92      |
| TS2                                                                   | -0.01      | -0.05      | 0.43       | 0.16       | TS6                                                                     | 0.30       | 0.25       | 0.35       | 0.06       |
| IM4                                                                   | -0.44      | -0.48      | -0.01      | -1.08      | IM12                                                                    | -0.26      | -0.41      | -0.09      | -1.02      |
| PC21                                                                  | 0.45       | 0.43       | 0.46       | -0.16      | PC51                                                                    | 0.46       | 0.43       | 0.44       | 0.38       |
| IM5                                                                   | -0.87      | -0.89      | -0.07      | -0.38      | IM13                                                                    | -0.83      | -0.92      | -0.02      | -1.35      |
| TS3                                                                   | -0.30      | -0.31      | 0.23       | -0.18      | TS7                                                                     | -0.02      | -0.08      | 0.96       | -0.32      |
| IM6                                                                   | -1.39      | -1.53      | -0.88      | -0.89      | IM14                                                                    | -0.83      | -0.87      | 0.19       | -1.39      |
| PC2                                                                   | -0.67      | -0.70      | -0.27      | -0.33      | PC5                                                                     | -1.07      | -1.11      | -0.71      | -2.00      |
| <b>VCoO<sub>2</sub>(CO) + O<sub>2</sub> → VCoO<sub>4</sub> + CO</b>   |            |            |            |            | <b>CrCoO<sub>2</sub>(CO) + O<sub>2</sub> → CrCoO<sub>4</sub> + CO</b>   |            |            |            |            |
| RC3                                                                   | 0.00       | 0.00       | 0.00       | 0.00       | RC6                                                                     | 0.00       | 0.00       | 0.00       | 0.00       |
| IM7                                                                   | -2.31      | -2.36      | -1.94      | -2.36      | IM15                                                                    | -1.06      | -1.12      | -0.39      | -0.11      |
| TS4                                                                   | -0.82      | -0.86      | -0.15      | -0.87      | TS8                                                                     | 0.40       | 0.24       | 1.02       | 0.51       |
| IM8                                                                   | -4.35      | -4.40      | -3.93      | -4.81      | IM16                                                                    | -1.50      | -1.51      | -1.07      | -0.72      |
| PC3                                                                   | -3.36      | -3.38      | -3.31      | -3.60      | PC6                                                                     | -2.52      | -2.55      | -2.39      | -2.50      |
|                                                                       |            |            |            |            | RC6                                                                     | 0.00       | 0.00       | 0.00       | 0.00       |
|                                                                       |            |            |            |            | IM17                                                                    | -1.72      | -1.74      | -1.27      | -2.54      |
|                                                                       |            |            |            |            | TS9                                                                     | -1.21      | -1.26      | -0.43      | -1.97      |
|                                                                       |            |            |            |            | IM18                                                                    | -3.83      | -3.86      | -3.36      | -4.71      |
|                                                                       |            |            |            |            | PC6                                                                     | -3.07      | -3.10      | -2.94      | -3.79      |

**Table S5.** The scaled rate constant values for the CO oxidation reaction with VCoO<sub>2</sub> and CrCoO<sub>2</sub> cluster.

| VCoO <sub>2</sub> |    |                        | CrCoO <sub>2</sub> |    |                        |
|-------------------|----|------------------------|--------------------|----|------------------------|
| reaction          | k  | Value                  | reaction           | k  | Value                  |
| (ii)              | k1 | $2.56 \times 10^{-19}$ | (vii)              | k5 | $1.39 \times 10^{-30}$ |
| (iii)             | k2 | $1.42 \times 10^{-23}$ | (viii)             | k6 | $9.73 \times 10^{-10}$ |
| (iv)              | k3 | $1.01 \times 10^{-20}$ | (ix)               | k7 | $6.68 \times 10^{-10}$ |
| (v)               | k4 | $4.97 \times 10^{-22}$ | (x)                | k8 | $2.50 \times 10^{-18}$ |

**Table S6.** Calculated free energy span ( $\delta E$ ) values for the CO oxidation reaction with VCoO<sub>2</sub> and CrCoO<sub>2</sub> cluster (energies in kcal/mol).

| Reaction                                                                          | $\delta E$ |
|-----------------------------------------------------------------------------------|------------|
| $\text{VCoO}_4 + \text{CO} \rightarrow \text{VCoO}_3 + \text{CO}_2$               | 26.48      |
| $\text{VCoO}_3 + 2\text{CO} \rightarrow \text{VCoO}_2(\text{CO}) + \text{CO}_2$   | 31.59      |
| $\text{VCoO}_2(\text{CO}) + \text{O}_2 \rightarrow \text{VCoO}_4 + \text{CO}$     | 34.51      |
| $\text{CrCoO}_4 + \text{CO} \rightarrow \text{CrCoO}_3 + \text{CO}_2$             | 37.98      |
| $\text{CrCoO}_3 + 2\text{CO} \rightarrow \text{CrCoO}_2(\text{CO}) + \text{CO}_2$ | 25.10      |
| $\text{CrCoO}_2(\text{CO}) + \text{O}_2 \rightarrow \text{CrCoO}_4 + \text{CO}$   | 32.95      |
